# Supplementary material for: Theoretical understanding of two-photon-induced fluorescence of isomorphic nucleoside analogs
Source: Royal Society of Chemistry journal article supplement (doi:10.1039/c5cp00134j), 2015-01-01
Supplement: c5cp00134j1.pdf [file c5cp00134j1.pdf]

# Supporting Information for Theoretical Understanding of Two-photon-induced Fluorescence of Iso- morphic Nucleoside Analogs<sup>†</sup>

Pralok K. Samanta,<sup>a</sup> and Swapan K. Pati,<sup>\*a,b</sup>

---

<sup>a</sup> Theoretical Sciences Unit, and <sup>b</sup> New Chemistry Unit, Jawaharlal Nehru Centre for Advanced Scientific Research, Bangalore 560064, India. Fax: +91-80-22082767; Tel: +91-80-22082839; E-mail: [pati@jncasr.ac.in](mailto:pati@jncasr.ac.in)

---

The 2PA cross sections ( $\sigma_{2p}$ ) for five lowest transitions are given in Table S1 in the unit of a.u. (atomic unit).  $a.u. = 1.896788 \text{ GM}$  and  $1 \text{ GM} = 10^{-50} \text{ cm}^4 \text{ s/photon}$ .

Table S1: Five Low Energy Transition Peaks of the Nucleoside Analogs in both Gas phase and in implicit Solvent. Oscillator Strength ( $f$ ) for 1PA and  $\sigma_{2p}$  (in a.u.) for 2PA are given in bracket.

| Molecules | Transition Energy (eV) |             |             |             |              |
|-----------|------------------------|-------------|-------------|-------------|--------------|
|           | Excitation             | Calculated  |             |             |              |
|           |                        | in gas      |             | in water    |              |
|           | 1PA                    | 2PA         | 1PA         | 2PA         |              |
| <b>1</b>  | $S_0 \rightarrow S_1$  | 3.48 (0.25) | 3.49 (3.73) | 3.42 (0.29) | 3.30 (16.50) |
|           | $S_0 \rightarrow S_2$  | 4.06 (0.03) | 4.06 (0.41) | 4.01 (0.06) | 3.99 (1.70)  |
|           | $S_0 \rightarrow S_3$  | 4.07 (0.01) | 4.07 (0.80) | 4.14 (0.00) | 4.16 (4.25)  |
|           | $S_0 \rightarrow S_4$  | 4.15 (0.00) | 4.14 (1.80) | 4.22 (0.00) | 4.23 (21.1)  |
|           | $S_0 \rightarrow S_5$  | 4.62 (0.00) | 4.61 (6.05) | 4.68 (0.19) | 4.62 (69.0)  |
| <b>2</b>  | $S_0 \rightarrow S_1$  | 3.70 (0.28) | 3.69 (2.40) | 3.75 (0.23) | 3.64 (9.61)  |
|           | $S_0 \rightarrow S_2$  | 4.50 (0.03) | 4.50 (1.41) | 4.53 (0.10) | 4.46 (19.3)  |
|           | $S_0 \rightarrow S_3$  | 4.58 (0.00) | 4.58 (0.11) | 4.59 (0.21) | 4.54 (8.81)  |
|           | $S_0 \rightarrow S_4$  | 4.65 (0.22) | 4.65 (13.1) | 4.76 (0.01) | 4.77 (12.7)  |
|           | $S_0 \rightarrow S_5$  | 4.91 (0.00) | 4.89 (2.65) | 4.99 (0.01) | 4.98 (115.0) |
| <b>3</b>  | $S_0 \rightarrow S_1$  | 3.75 (0.28) | 3.75 (5.99) | 3.71 (0.31) | 3.75 (6.17)  |
|           | $S_0 \rightarrow S_2$  | 4.66 (0.00) | 4.65 (0.54) | 4.65 (0.41) | 4.59 (0.08)  |
|           | $S_0 \rightarrow S_3$  | 4.76 (0.32) | 4.76 (1.31) | 4.78 (0.00) | 4.77 (1.58)  |
|           | $S_0 \rightarrow S_4$  | 4.80 (0.02) | 4.78 (2.64) | 5.04 (0.00) | 4.78 (2.11)  |
|           | $S_0 \rightarrow S_5$  | 5.00 (0.00) | 4.98 (1.73) | 5.09 (0.00) | 5.03 (2.37)  |
| <b>4</b>  | $S_0 \rightarrow S_1$  | 4.40 (0.11) | 4.40 (1.96) | 4.26 (0.28) | 4.10 (38.30) |
|           | $S_0 \rightarrow S_2$  | 4.65 (0.12) | 4.65 (5.72) | 4.51 (0.07) | 4.46 (14.70) |
|           | $S_0 \rightarrow S_3$  | 4.77 (0.00) | 4.76 (0.05) | 4.92 (0.20) | 4.80 (1.49)  |
|           | $S_0 \rightarrow S_4$  | 4.89 (0.00) | 4.86 (1.55) | 4.93 (0.00) | 4.96 (0.14)  |
|           | $S_0 \rightarrow S_5$  | 5.07 (0.16) | 5.07 (1.01) | 5.23 (0.00) | 5.20 (2.23)  |
| <b>5</b>  | $S_0 \rightarrow S_1$  | 3.64 (0.16) | 3.64 (0.39) | 3.59 (0.20) | 3.49 (2.10)  |
|           | $S_0 \rightarrow S_2$  | 3.94 (0.00) | 3.94 (0.02) | 4.21 (0.00) | 4.17 (1.30)  |
|           | $S_0 \rightarrow S_3$  | 4.67 (0.01) | 4.64 (3.91) | 4.56 (0.06) | 4.51 (25.4)  |
|           | $S_0 \rightarrow S_4$  | 4.68 (0.01) | 4.68 (3.80) | 4.83 (0.00) | 4.88 (59.7)  |
|           | $S_0 \rightarrow S_5$  | 4.70 (0.04) | 4.70 (5.42) | 4.88 (0.00) | 4.93 (27.9)  |
| <b>6</b>  | $S_0 \rightarrow S_1$  | 4.17 (0.07) | 4.17 (1.97) | 4.07 (0.08) | 4.01 (6.76)  |
|           | $S_0 \rightarrow S_2$  | 4.49 (0.00) | 4.49 (0.02) | 4.69 (0.00) | 4.68 (0.19)  |
|           | $S_0 \rightarrow S_3$  | 5.00 (0.01) | 4.99 (0.37) | 4.83 (0.03) | 4.82 (3.00)  |
|           | $S_0 \rightarrow S_4$  | 5.11 (0.02) | 5.10 (1.03) | 5.00 (0.12) | 4.98 (1.46)  |
|           | $S_0 \rightarrow S_5$  | 5.19 (0.07) | 5.18 (0.40) | 5.20 (0.00) | 5.32 (1.22)  |
| <b>7</b>  | $S_0 \rightarrow S_1$  | 3.86 (0.10) | 3.86 (2.92) | 3.66 (0.13) | 3.57 (8.91)  |
|           | $S_0 \rightarrow S_2$  | 4.54 (0.01) | 4.52 (3.35) | 4.69 (0.02) | 4.63 (5.15)  |
|           | $S_0 \rightarrow S_3$  | 4.72 (0.00) | 4.72 (1.11) | 4.76 (0.00) | 4.79 (0.14)  |
|           | $S_0 \rightarrow S_4$  | 4.75 (0.00) | 4.75 (2.18) | 4.99 (0.01) | 4.98 (9.78)  |
|           | $S_0 \rightarrow S_5$  | 4.88 (0.00) | 4.88 (7.02) | 5.01 (0.00) | 5.00 (2.84)  |
| <b>8</b>  | $S_0 \rightarrow S_1$  | 3.66 (0.08) | 3.67 (2.52) | 3.85 (0.10) | 3.78 (5.97)  |
|           | $S_0 \rightarrow S_2$  | 4.52 (0.03) | 4.52 (0.63) | 4.61 (0.01) | 4.57 (6.26)  |
|           | $S_0 \rightarrow S_3$  | 4.66 (0.00) | 4.65 (0.03) | 4.71 (0.25) | 4.63 (0.30)  |
|           | $S_0 \rightarrow S_4$  | 4.70 (0.12) | 4.70 (0.92) | 4.88 (0.02) | 4.85 (7.26)  |
|           | $S_0 \rightarrow S_5$  | 4.76 (0.03) | 4.76 (1.91) | 4.93 (0.03) | 4.87 (2.27)  |
